# Supplementary material
Source: Springer Nature journal article supplement (https://www.springermedizin.de/resource/supplementary/12913_2013_3035_MOESM4_ESM.pdf/9533284)

**Topic:** The term chronic and different way GP and patient might interpret

**Quote:** "What do you think about the words chronic kidney disease, what do they make you feel?"

*Person 1: Frightening.*

*Person 2: Well it is frightening because at our age we know chronic as being...*

*Person 3: Hard, bad.*

*Person 4: The end of the road really don't we.*

*Person 5: Chronic is, you know, you're critical, sort of, really, you're at a stage where, you know, things can go vastly wrong"*

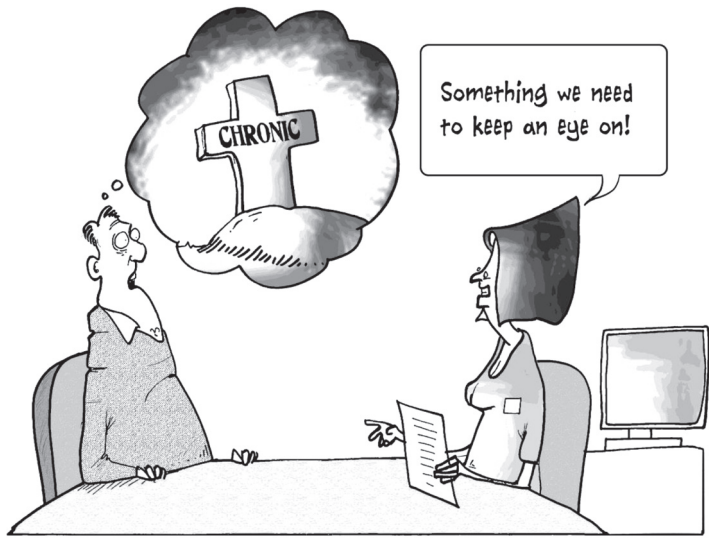

Supplement: MOESM4 [file 9533284]
